# Supplementary material for: Modeling of HCHO and CHOCHO at a semi-rural site in southern China during the PRIDE-PRD2006 campaign
Source: Copernicus journal article supplement (doi:10.5194/acp-14-12291-2014), 2014-11-21
Supplement: Supplementary file 1 [file acp-14-12291-2014-supplement.pdf]

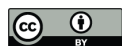

*Supplement of*

## **Modeling of HCHO and CHOCHO at a semi-rural site in southern China during the PRIDE-PRD2006 campaign**

**X. Li et al.**

*Correspondence to:* X. Li (x.li@fz-juelich.de) and A. Wahner (a.wahner@fz-juelich.de)

Table S1: Instrumentation for atmospheric trace gas, aerosol, and meteorology measurements at the Back Garden supersite.

| Parameter                                                                                     | Technique                              | Time Res.   | Accuracy              | Position       | Reference                 |
|-----------------------------------------------------------------------------------------------|----------------------------------------|-------------|-----------------------|----------------|---------------------------|
| HCHO, CHOCHO                                                                                  | MAX-DOAS                               | 1 h         | 35%                   | hotel roof     | Li et al. (2013)          |
| OH                                                                                            | LIF <sup>1</sup>                       | 5 min       | 20%                   | container roof | Lu et al. (2012)          |
| O <sub>3</sub>                                                                                | UV <sup>2</sup>                        | 1 min       | 5%                    | container roof | Hofzumahaus et al. (2009) |
| NO                                                                                            | CL <sup>3</sup>                        | 1 min       | 7%                    | hotel roof     | Hofzumahaus et al. (2009) |
| NO <sub>2</sub>                                                                               | Photolytic converter + CL <sup>3</sup> | 1 min       | 13%                   | hotel roof     | Hofzumahaus et al. (2009) |
| HONO                                                                                          | LOPAP <sup>4</sup>                     | 5 min       | 10%                   | container roof | Li et al. (2012)          |
| CO                                                                                            | NDIR <sup>5</sup>                      | 1 min       | 5%                    | hotel roof     | Hofzumahaus et al. (2009) |
| CH <sub>4</sub>                                                                               | FTIR <sup>6</sup>                      | 10 min      | 4%                    | hotel roof     | Lu et al. (2012)          |
| C <sub>2</sub> H <sub>2</sub> , C <sub>2</sub> H <sub>4</sub> , C <sub>2</sub> H <sub>6</sub> | Offline GC-FID/MS <sup>7</sup>         | 15 min      | 5 – 10%               | hotel roof     | Liu et al. (2008)         |
| C3 – C12 NMHCs                                                                                | Online GC-FID                          | 1 h         | 10%                   | hotel roof     | Wang et al. (2008)        |
| H <sub>2</sub> O <sub>2</sub> , CH <sub>3</sub> OOH                                           | Online HPLC                            | 20 – 60 min | 10%                   | hotel roof     | Hua et al. (2008)         |
| PAN, PPN                                                                                      | Online GC-ECD                          | 5 min       | 15%, 20%              | hotel roof     | Wang et al. (2010)        |
| <i>S<sub>a</sub></i> <sup>a</sup>                                                             | TDMPS-APS <sup>8</sup>                 | 10 min      | 10 – 30%              | hotel roof     | Yue et al. (2010)         |
| Aerosol composition <sup>b</sup>                                                              | Q-AMS                                  | 10 min      | 14%                   | hotel roof     | Hu et al. (2012)          |
| Black carbon                                                                                  | MAAP <sup>9</sup>                      | 2 min       | 10%                   | hotel roof     | –                         |
| Photolysis frequency                                                                          | SR <sup>10</sup>                       | 1 min       | 10%                   | hotel roof     | Bohn et al. (2008)        |
| Temperature                                                                                   | USA <sup>11</sup>                      | 10 min      | 0.3 K                 | container roof | Li et al. (2012)          |
| Pressure                                                                                      | Vaisala WXT510                         | 10 min      | 0.5 hPa               | hotel roof     | Li et al. (2012)          |
| Relative humidity                                                                             | Vaisala WXT510                         | 10 min      | 3%                    | hotel roof     | Li et al. (2012)          |
| Wind speed                                                                                    | USA <sup>11</sup>                      | 10 min      | 0.1 m s <sup>−1</sup> | container roof | –                         |
| Wind direction                                                                                | USA <sup>11</sup>                      | 10 min      | 0.1 °                 | container roof | –                         |

<sup>a</sup>: Aerosol surface concentration for aerosols with diameter of 3 nm – 10  $\mu$ m. <sup>b</sup>: Organic matter and inorganic ions (sulfate, nitrate, ammonium, and chloride) of aerosols with diameter less than 1  $\mu$ m.

<sup>1</sup>: Laser Induced Florescence. <sup>2</sup>: Ultraviolet absorption instrument (Thermo Electron, model 49C). <sup>3</sup>: Chemiluminescence instrument (Thermo Electron, model 42CTL). <sup>4</sup>: Long-path absorption photometry. <sup>5</sup>: Non-Dispersive Infrared gas analyzer (Thermo Electron, Model 48C). <sup>6</sup>: Fourier-transform infrared spectrometry. <sup>7</sup>: Canister sampling followed by GC-FID/MS analysis. <sup>8</sup>: Twin Differential Mobility Particle Sizer and Aerodynamic Particle Sizer. <sup>9</sup>: Multi-angle absorption photometer (Thermo Electron MAAP5012). <sup>10</sup>: Spectral radiometry. <sup>11</sup>: Ultra sonic anemometer (USA-1, Metek, Germany).

Table S2: Model scenarios used in the sensitivity study of HCHO and CHOCHO simulation during the PRIDE-PRD2006 campaign.

| Simulation | Mechanisms                                                                                                                | Purpose                                                                                 |
|------------|---------------------------------------------------------------------------------------------------------------------------|-----------------------------------------------------------------------------------------|
| M0         | MCM v3.2 with $\tau_D = 24$ h                                                                                             | Base run                                                                                |
| MS1        | as M0, but using different OH concentrations                                                                              | Sensitivity of HCHO and CHOCHO on OH                                                    |
| MS2        | as M0, but using different values of $\tau_D$                                                                             | Sensitivity of HCHO and CHOCHO on the flushing out all species in the model             |
| MS3        | as M0, but using different NMHCs concentrations                                                                           | Sensitivity of HCHO and CHOCHO on NMHCs                                                 |
| MS4        | as M0, but using different NO and NO <sub>2</sub> concentrations                                                          | Sensitivity of HCHO and CHOCHO on NO <sub>x</sub>                                       |
| MS5        | as M0, with measured H <sub>2</sub> O <sub>2</sub> and CH <sub>3</sub> OOH concentrations as additional model constraints | Sensitivity of HCHO and CHOCHO on H <sub>2</sub> O <sub>2</sub> and CH <sub>3</sub> OOH |
| MS6        | as M0, with measured PAN and PPN concentrations as additional model constraints                                           | Sensitivity of HCHO and CHOCHO on PANs                                                  |

Table S3: Estimated uncertainties of model input parameters and reaction rate constant.

| Input parameter     | Uncertainty factor |
|---------------------|--------------------|
| $j$ <sup>a</sup>    | $\times 1.1$       |
| $\tau_D$            | $\times 2$         |
| T                   | $\times 1.005$     |
| P                   | $\times 1.005$     |
| OH                  | $\times 1.2$       |
| H <sub>2</sub>      | $\times 1.2$       |
| CO                  | $\times 1.05$      |
| NO                  | $\times 1.07$      |
| NO <sub>2</sub>     | $\times 1.13$      |
| O <sub>3</sub>      | $\times 1.05$      |
| H <sub>2</sub> O    | $\times 1.1$       |
| HONO                | $\times 1.1$       |
| CH <sub>4</sub>     | $\times 1.04$      |
| Ethane <sup>b</sup> | + 1 ppb            |
| Ethene <sup>b</sup> | + 2 ppb            |
| Ethyne <sup>b</sup> | + 1 ppb            |
| C3–C12 NMHCs        | $\times 1.2$       |
| $k_i$ <sup>c</sup>  | $\times 1.3$       |

<sup>a</sup> The errors of the measured photolysis frequencies are assumed to be correlated since they were derived from the same measurement of the solar actinic flux.

<sup>b</sup> Campaign averaged values were applied for ethane, ethene, and ethyne, so that the standard deviation of the canister samples were propagated as uncertainties rather than the measurement accuracy.

<sup>c</sup> All the reaction constants of non-photolytic reactions in MCM v3.2 are estimated to have 30% accuracy ( $1\sigma$ ).

Figure S1: Land cover type of the Pearl River Delta region for the year of 2006. The image is plotted based on the MODIS land cover data set MCD12C1 (version 051). The data set is obtained from <https://lpdaac.usgs.gov>, maintained by the NASA Land Processes Distributed Active Archive Center (LP DAAC) at the USGS/Earth Resources Observation and Science (EROS) Center, Sioux Falls, South Dakota.

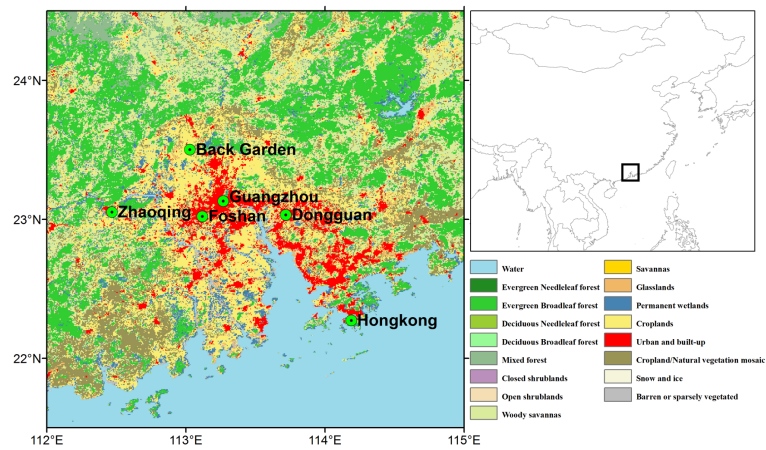

Figure S2: Mean diurnal variation of the uncertainty of the modeled HCHO and CHOCHO concentrations by the model base-case (M0). The red, blue, and pink lines represent the error originated from the uncertainty of physical parameters (i.e., photolysis frequencies, deposition lifetime, T, P), radical and trace gas concentrations, and reaction rate constants of non-photolytic reactions in the model. The black lines are the sum of the above three errors.

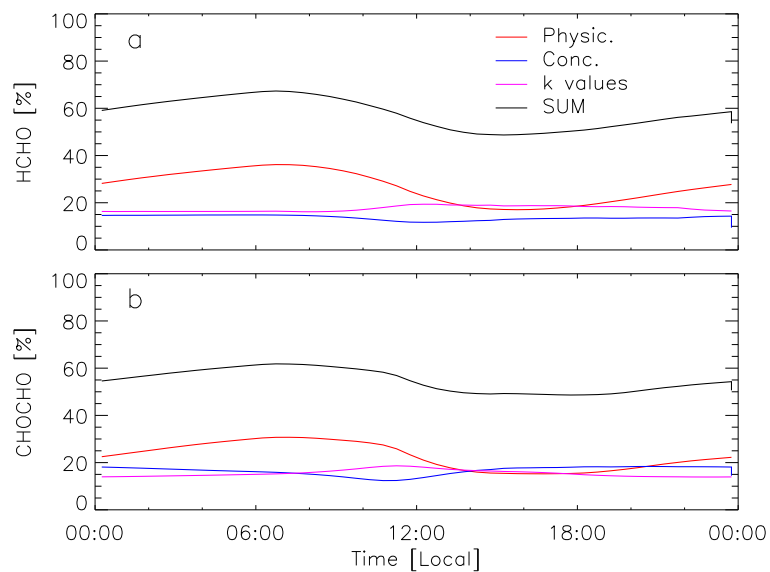

Figure S3: Measured and modeled HCHO and CHOCHO concentrations in the 6 cloud-free days during the PRIDE-PRD2006 campaign. The black “o” and the error bar refers to the measured concentration and the  $1\sigma$  statistic error of the measurement, respectively. Lines with different colors represent results of the model base-case (M0) and of model runs constrained by different  $\text{HO}_x$  concentrations, i.e., model MS1 as described in the paper.

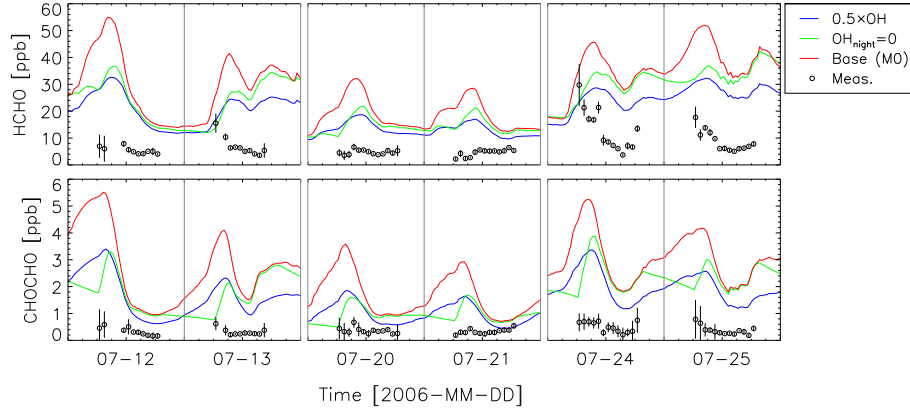

Figure S4: Measured and modeled HCHO and CHOCHO concentrations and total OH reactivity in the 6 cloud-free days during the PRIDE-PRD2006 campaign. The black “o” and the error bar refers to the measured concentration and the  $1\sigma$  statistic error of the measurement, respectively. Lines with different colors represent results of the model base-case (M0) and of model runs constrained by different values of flushing-out parameter ( $\tau_D$ ), i.e., model MS2 as described in Table S2.

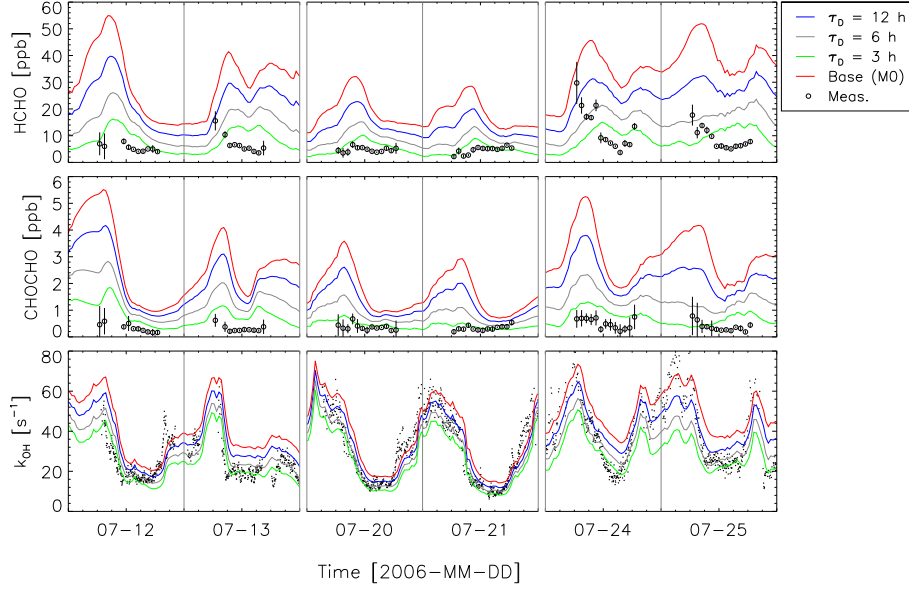



Figure S5: Measured and modeled HCHO and CHOCHO concentrations in the 6 cloud-free days during the PRIDE-PRD2006 campaign. The black “o” and the error bar refers to the measured concentration and the  $1\sigma$  statistic error of the measurement, respectively. Lines with different colors represent results of the model base-case (M0) and of models constrained by different NMHCs concentrations, i.e., model MS3 as described Table S2. Iso\* represents the model scenario in which the isoprene concentration between 8:00–16:00 is constrained by 52% of the measured value.

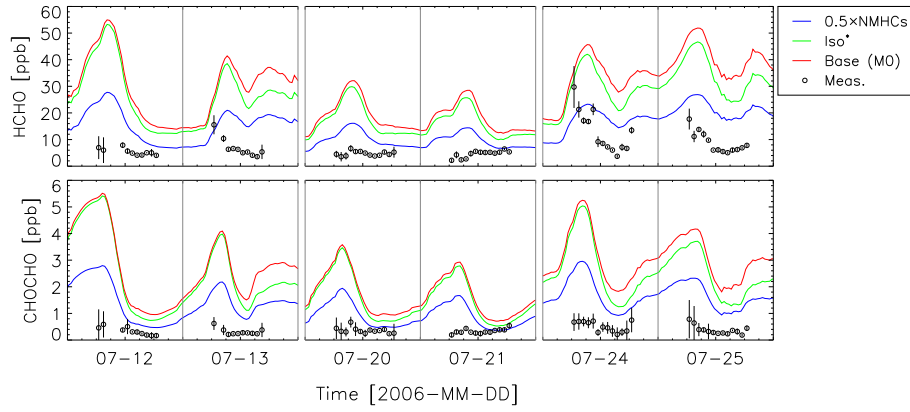

Figure S6: Measured and modeled HCHO and CHOCHO concentrations in the 6 cloud-free days during the PRIDE-PRD2006 campaign. The black “o” and the error bar refers to the measured concentration and the  $1\sigma$  statistic error of the measurement, respectively. Lines with different colors represent results of the model base-case (M0) and of models constrained by different  $\text{H}_2\text{O}_2$  (HP) and  $\text{CH}_3\text{OOH}$  (MHP) concentrations, i.e., model MS5 as described in Table S2.

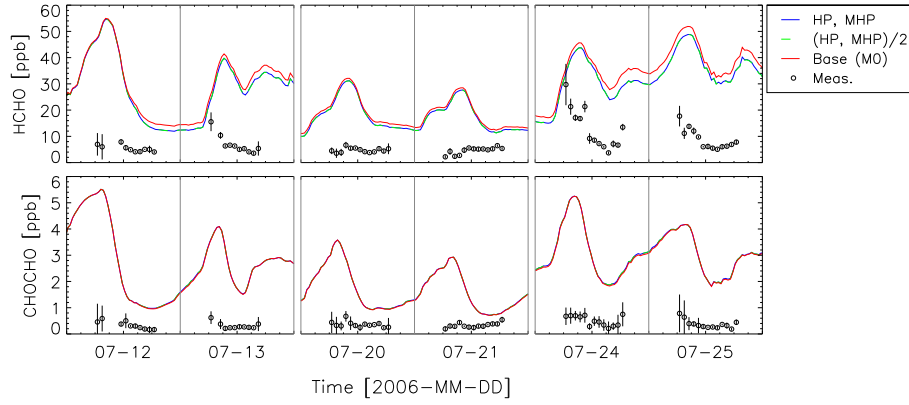

Figure S7: Measured and modeled HCHO and CHOCHO concentrations in the 6 cloud-free days during the PRIDE-PRD2006 campaign. The black “o” and the error bar refers to the measured concentration and the  $1\sigma$  statistic error of the measurement, respectively. Lines with different colors represent results of the model base-case (M0) and of models constrained by different PANs (PAN, PPN) concentrations, i.e., model MS6 as described in Table S2.

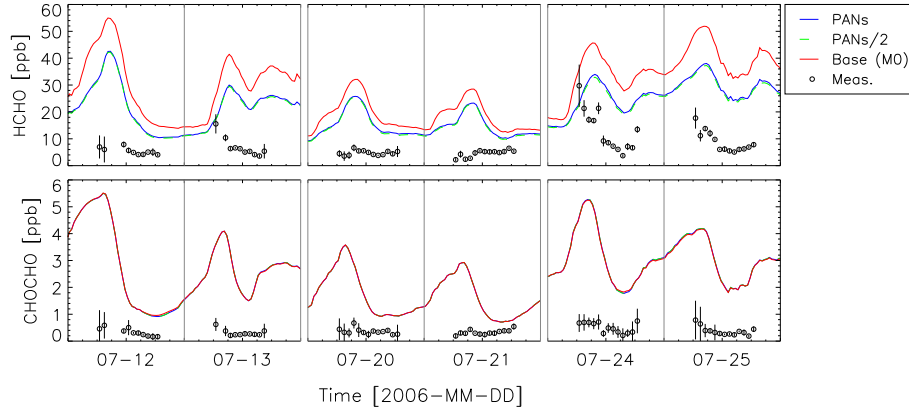

## References

- Bohn, B., Corlett, G. K., Gillmann, M., Sanghavi, S., Stange, G., Tensing, E., Vrekoussis, M., Bloss, W. J., Clapp, L. J., Kortner, M., Dorn, H. P., Monks, P. S., Platt, U., Plass-Dlmer, C., Mihalopoulos, N., Heard, D. E., Clemmitshaw, K. C., Meixner, F. X., Prevot, A. S. H., and Schmitt, R.: Photolysis frequency measurement techniques: results of a comparison within the ACCENT project, *Atmos. Chem. Phys.*, 8, 5373–5391, doi:10.5194/acp-8-5373-2008, 2008.
- Hofzumahaus, A., Rohrer, F., Lu, K., Bohn, B., Brauers, T., Chang, C.-C., Fuchs, H., Holland, F., Kita, K., Kondo, Y., Li, X., Lou, S., Shao, M., Zeng, L., Wahner, A., and Zhang, Y.: Amplified Trace Gas Removal in the Troposphere, *Science*, 324, 1702–1704, doi:10.1126/science.1164566, 2009.
- Hu, W. W., Hu, M., Deng, Z. Q., Xiao, R., Kondo, Y., Takegawa, N., Zhao, Y. J., Guo, S., and Zhang, Y. H.: The characteristics and origins of carbonaceous aerosol at a rural site of PRD in summer of 2006, *Atmos. Chem. Phys.*, 12, 1811–1822, doi:10.5194/acp-12-1811-2012, 2012.
- Hua, W., Chen, Z. M., Jie, C. Y., Kondo, Y., Hofzumahaus, A., Takegawa, N., Chang, C. C., Lu, K. D., Miyazaki, Y., Kita, K., Wang, H. L., Zhang, Y. H., and Hu, M.: Atmospheric hydrogen peroxide and organic hydroperoxides during PRIDE-PRD’06, China: their concentration, formation mechanism and contribution to secondary aerosols, *Atmos. Chem. Phys.*, 8, 6755–6773, doi:10.5194/acp-8-6755-2008, 2008.
- Li, X., Brauers, T., Häseler, R., Bohn, B., Fuchs, H., Hofzumahaus, A., Holland, F., Lou, S., Lu, K. D., Rohrer, F., Hu, M., Zeng, L. M., Zhang, Y. H., Garland, R. M., Su, H., Nowak, A., Wiedensohler, A., Takegawa, N., Shao, M., and Wahner, A.: Exploring the atmospheric chemistry of nitrous acid (HONO) at a rural site in Southern China, *Atmos. Chem. Phys.*, 12, 1497–1513, doi:10.5194/acp-12-1497-2012, 2012.
- Li, X., Brauers, T., Hofzumahaus, A., Lu, K., Li, Y. P., Shao, M., Wagner, T., and Wahner, A.: MAX-DOAS measurements of NO<sub>2</sub>, HCHO and CHOCHO at a rural site in Southern China, *Atmos. Chem. Phys.*, 13, 2133–2151, doi:10.5194/acp-13-2133-2013, 2013.
- Liu, Y., Shao, M., Lu, S., Chang, C.-c., Wang, J.-L., and Chen, G.: Volatile Organic Compound (VOC) measurements in the Pearl River Delta (PRD) region, China, *Atmos. Chem. Phys.*, 8, 1531–1545, doi:10.5194/acp-8-1531-2008, 2008.
- Lu, K. D., Rohrer, F., Holland, F., Fuchs, H., Bohn, B., Brauers, T., Chang, C. C., Hseler, R., Hu, M., Kita, K., Kondo, Y., Li, X., Lou, S. R., Nehr, S., Shao, M., Zeng, L. M., Wahner, A., Zhang, Y. H., and Hofzumahaus, A.: Observation and modelling of OH and HO<sub>2</sub> concentrations in the Pearl River Delta 2006: a missing OH source in a VOC rich atmosphere, *Atmos. Chem. Phys.*, 12, 1541–1569, doi:10.5194/acp-12-1541-2012, 2012.

- Wang, B., Shao, M., Roberts, J. M., Yang, G., Yang, F., Hu, M., Zeng, L., Zhang, Y., and Zhang, J.: Ground-based on-line measurements of peroxyacetyl nitrate (PAN) and peroxypropionyl nitrate (PPN) in the Pearl River Delta, China, *Intern. J. Environ. Anal. Chem.*, 90, 548–559, doi:10.1080/03067310903194972, 2010.
- Wang, J.-L., Wang, C.-H., Lai, C.-H., Chang, C.-C., Liu, Y., Zhang, Y., Liu, S., and Shao, M.: Characterization of ozone precursors in the Pearl River Delta by time series observation of non-methane hydrocarbons, *Atmos. Environ.*, 42, 6233–6246, doi:10.1016/j.atmosenv.2008.01.050, 2008.
- Yue, D. L., Hu, M., Wu, Z. J., Guo, S., Wen, M. T., Nowak, A., Wehner, B., Wiedensohler, A., Takegawa, N., Kondo, Y., Wang, X. S., Li, Y. P., Zeng, L. M., and Zhang, Y. H.: Variation of particle number size distributions and chemical compositions at the urban and downwind regional sites in the Pearl River Delta during summertime pollution episodes, *Atmos. Chem. Phys.*, 10, 9431–9439, doi:10.5194/acp-10-9431-2010, 2010.
